# Supplementary material
Source: publisher figshare collection journal article supplement (https://acs.figshare.com/ndownloader/files/3894181)
Supplement: Supplementary file 1 [file 3894181]

## Support Information

### **Ternary Bulk Heterojunction Photovoltaic Cells Composed of Small Molecule Donor Additive as Cascade Material**

Lei Ye,<sup>a†</sup> Hai-Hua Xu,<sup>b†</sup> Hui Yu,<sup>b</sup> Wang-Ying Xu,<sup>a</sup> Hao Li,<sup>a</sup> Han Wang,<sup>a</sup> Ni Zhao,<sup>\*b</sup>  
Jian-Bin Xu<sup>\*a</sup>

<sup>a</sup> Department of Electronic Engineering, Materials Science and Technology Research Center, The Chinese University of Hong Kong, Shatin, New Territories, Hong Kong, China.

<sup>b</sup> Department of Electronic Engineering, The Chinese University of Hong Kong, Shatin, New Territories, Hong Kong, China.

<sup>†</sup> L. Ye and H. H. Xu contributed equally to this work.

\* Corresponding author at: Department of Electronic Engineering, Materials Science and Technology Research Center, The Chinese University of Hong Kong, Shatin, New Territories, Hong Kong, China. Fax: +852-2609-8297; Tel: +852-2609-8297; E-mail address:

[nzhao@ee.cuhk.edu.hk](mailto:nzhao@ee.cuhk.edu.hk)

[jbxu@ee.cuhk.edu.hk](mailto:jbxu@ee.cuhk.edu.hk)

**Figure S1.** Transfer characteristic of DTDCTB Bottom-gated field-effect transistors using dielectric layer of SiO<sub>2</sub>.

**Figure S2.** Atomic force microscopy (AFM) images of (a) P3HT: PC<sub>61</sub>BM (1: 1), (b) P3HT: DTDCTB: PC<sub>61</sub>BM (0.9: 0.1: 1), (c) P3HT: DTDCTB: PC<sub>61</sub>BM (0.8: 0.2: 1), (d) P3HT: DTDCTB: PC<sub>61</sub>BM (0.7: 0.3: 1), and (e) P3HT: DTDCTB: PC<sub>61</sub>BM (0.6: 0.4: 1).

**Figure S3.** *J-V* characteristics of the ternary devices of P3HT/DTDCTB/PC<sub>61</sub>BM with various weight ratios and binary device of P3HT/PC<sub>61</sub>BM fabricated without DIO as solvent additive.

**Figure S4.** *J-V* characteristic of the binary blend device of DTDCTB/PC<sub>61</sub>BM fabricated as the same process of the device of P3HT/PC<sub>61</sub>BM.

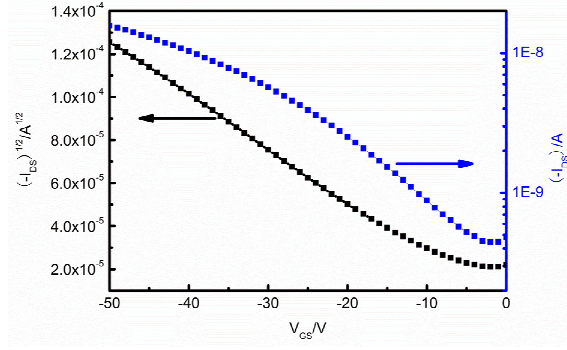

**Figure S1** Transfer characteristics of DTDCTB TFT using dielectric layer of SiO<sub>2</sub>.

(V<sub>DS</sub>=-50 V, W=1 mm, and L=150 μm.)

To fabricate the FET device based DTDCTB, a heavily n-doped silicon wafer with a 300 nm thickness SiO<sub>2</sub> was chosen as the substrate. The substrate was firstly cleaned ultrasonically in acetone and isopropyl alcohol (IPA) for 10 minutes, respectively. A thin film of DTDCTB was spun cast on the top of SiO<sub>2</sub>, then evaporated under a high vacuum. Finally, gold source-drain electrodes with a thickness of 40 nm were evaporated with a shadow mask to get a channel length of  $L = 150 \mu\text{m}$  and channel width of  $W = 1 \text{ mm}$ .

As shown as figure S1, the bottom-gate field-effect transistor of DTDCTB is investigated, and the hole mobility in extracted saturation regime is  $1.18 \times 10^{-4} \text{ V}^{-1} \text{ s}^{-1}$ .

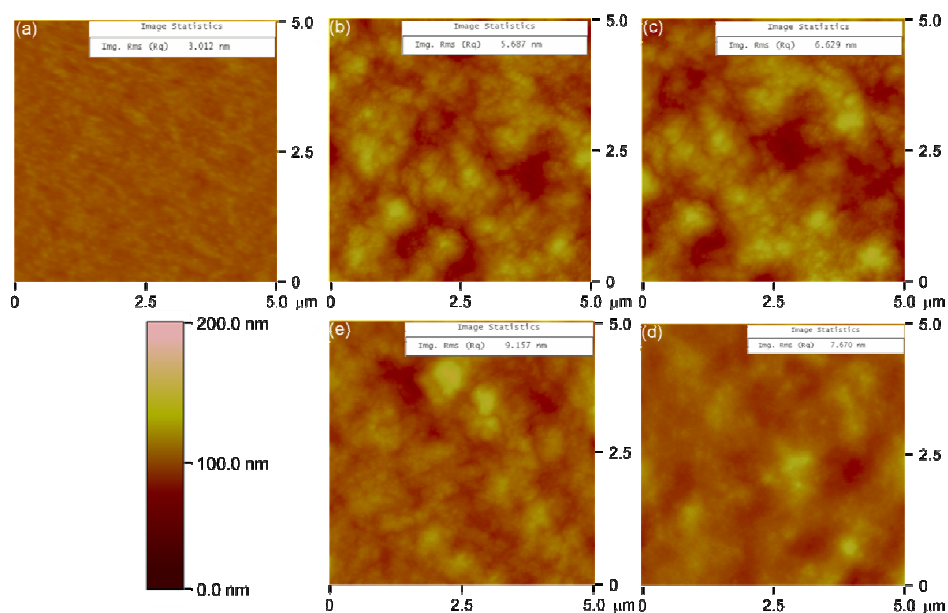

**Figure S2** Atomic force microscopy (AFM) images of (a) P3HT: PC<sub>61</sub>BM (1: 1), (b) P3HT: DTDCTB: PC<sub>61</sub>BM (0.9: 0.1: 1), (c) P3HT: DTDCTB: PC<sub>61</sub>BM (0.8: 0.2: 1), (d) P3HT: DTDCTB: PC<sub>61</sub>BM (0.7: 0.3: 1), and (e) P3HT: DTDCTB: PC<sub>61</sub>BM (0.6: 0.4: 1)

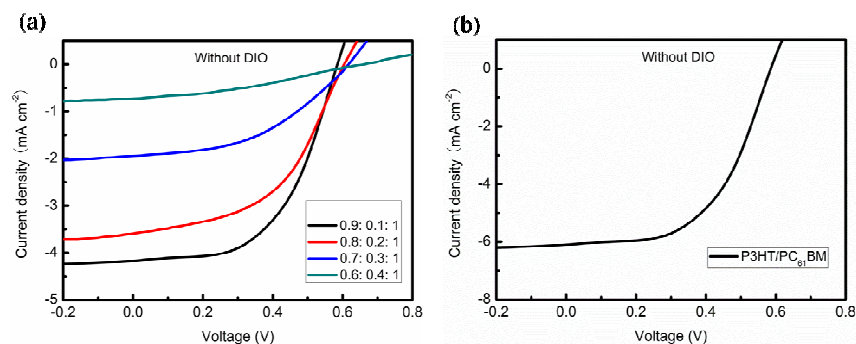

**Figure S3.** (a)  $J$ - $V$  characteristic of the ternary device of P3HT/DTDCTB/PC<sub>61</sub>BM with various weight ratios fabricated without DIO as solvent additive. (b)  $J$ - $V$  characteristic of the binary device of P3HT/PC<sub>61</sub>BM (1: 1) fabricated without DIO as solvent additive.

The ternary P3HT/DTDCTB/PC<sub>61</sub>BM and binary P3HT/PC<sub>61</sub>BM solar cells were fabricated following the methods reported previously for P3HT-based solar cells with solvent additives.<sup>1-5</sup> In these solar cells, the DIO solvent additive helps to control the morphology and nanoscale phase separation of the donor/acceptor interpenetrating network in the active layer.<sup>4,5</sup>

As shown in Figure S3, the devices without DIO solvent additive demonstrate low performances.

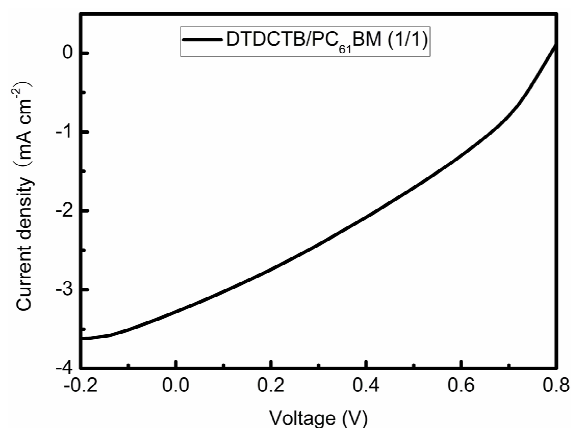

**Figure S4.**  $J$ - $V$  characteristic of the binary blend device of DTDCTB/PC<sub>61</sub>BM fabricated as the same process of the device of P3HT/PC<sub>61</sub>BM.

The binary blend device of DTDCTB/PC<sub>61</sub>BM demonstrated a PCE of 0.85%, with an open circuit voltage ( $V_{OC}$ ) of 0.78 V, a short circuit current ( $J_{SC}$ ) of 3.28 mA/cm<sup>2</sup> and FF of 0.33.

## References

- (1) Salim, T.; Wong, L. H.; Bräuer, B.; Kukreja, R.; Foo, Y. L.; Bao, Z. N.; Lam, Y. M. Solvent additives and their effects on blend morphologies of bulk heterojunctions. *J. Mater. Chem.* **2011**, *21*, 242-250.
- (2) Chen, H. Y.; Yang, H. C.; Yang, G. W.; Sista, S.; Zadoyan, R.; Li, G.; Yang, Y. Fast-Grown Interpenetrating Network in Poly(3-hexylthiophene): Methanofullerenes Solar Cells Processed with Additive. *J. Phys. Chem. C* **2009**, *113*, 7946-7953.
- (3) Sun, Y. P.; Cui, C. H.; Wang, H. Q.; Li Y. F. Efficiency Enhancement of Polymer

- Solar Cells Based on Poly(3-hexylthiophene)/Indene-C<sub>70</sub> Bisadduct via Methylthiophene Additive. *Adv. Energy Mater.* **2011**, *1*, 1058-1061.
- (4) Guo, X.; Cui, C. H.; Zhang, M. J.; Huo, L. J.; Huang Y.; Hou, J. H.; Li, Y. F. High efficiency polymer solar cells based on poly(3-hexylthiophene)/indene-C<sub>70</sub> bisadduct with solvent additive. *Energy Environ. Sci.* **2012**, *5*, 7943-7949.
- (5) Chang, L. L.; Lademann, H. W. A.; Bonekamp, J. B.; Meerholz, K.; Moulé, A. J. Effect of Trace Solvent on the Morphology of P3HT:PCBM Bulk Heterojunction Solar Cells. *Adv. Funct. Mater.* **2011**, *21*, 1779-1787.
